# Supplementary material
Source: bioRxiv or medRxiv preprint supplement (https://www.biorxiv.org/highwire/filestream/52704/field_highwire_adjunct_files/0/070730-1.pdf)

# Supplementary Figure 1

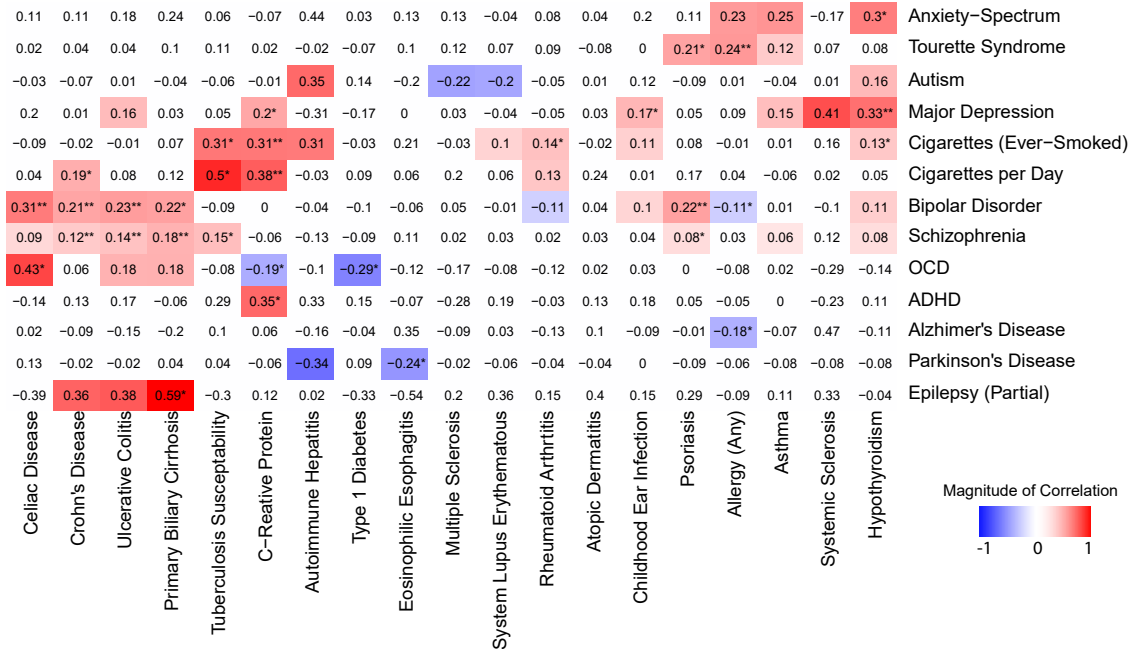

Magnitude of Correlation

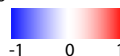

Supplement: Supplementary file [file 070730-1.pdf]
